# Supplementary material for: Impact of a comprehensive tobacco control policy package on acute myocardial infarction and stroke hospital admissions in Beijing, China: interrupted time series study
Source: PubMed Central journal article supplement — Tob Control. 2020 Jul 15;30(4):434–42. doi: 10.1136/tobaccocontrol-2020-055663 (PMC8237181; doi:10.1136/tobaccocontrol-2020-055663), 2020-07-15
Supplement: tobaccocontrol-2020-055663supp001.pdf [file tobaccocontrol-2020-055663supp001.pdf]

**Impact of a comprehensive tobacco control policy package on acute myocardial infarction and stroke hospital admissions in Beijing, China: interrupted time series study**

**Supplementary Files**

Supplementary figure 1 Annual hospital admission rate of AMI and stroke in Beijing from 2013 to 2017

Supplementary figure 2 The overall monthly number of hospital admissions for AMI and stroke

Supplementary table 1 Annual hospital admission rates (1/100,000) of AMI and stroke in age and sex subgroups

Supplementary table 2 Average percentage change (%) in hospital admission rates for AMI and stroke after the Beijing tobacco control policy package (on a semesterly basis)

Supplementary table 3 Average percentage change (%) after the false dates for AMI and stroke hospital admissions

Supplementary table 4 Average percentage change (%) in hospital admission rates for AMI and stroke using spline model of secular trend of time (95% CI)

Supplementary table 5 Average percentage change (%) in hospital admission rates for AMI including readmission within 28 days

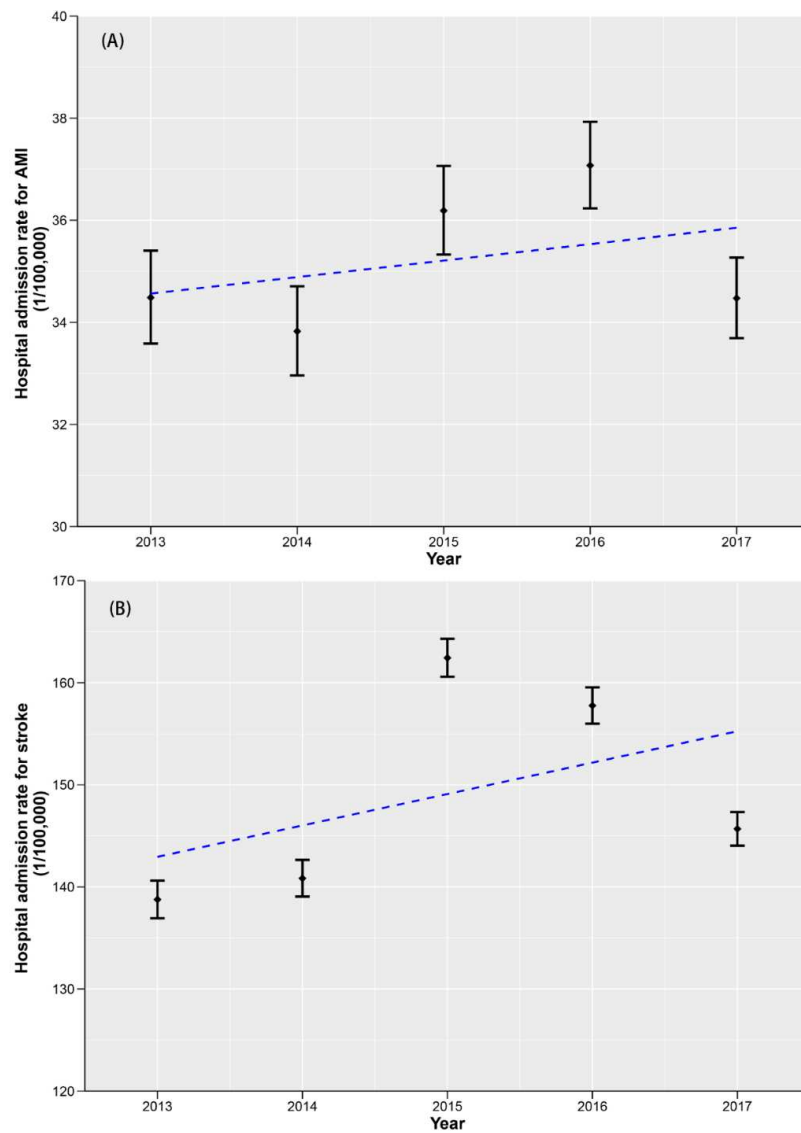

Supplementary figure 1 Annual hospital admission rate of AMI and stroke in Beijing from 2013 to 2017

AMI, acute myocardial infarction. Panel A, for AMI. Panel B, for stroke. The rates were age- and sex- adjusted according to the population in the sixth demographic census in Beijing. Error bars showed the 95% CIs. The blue dotted line showed the temporal trend of the rates from 2013 to 2017.

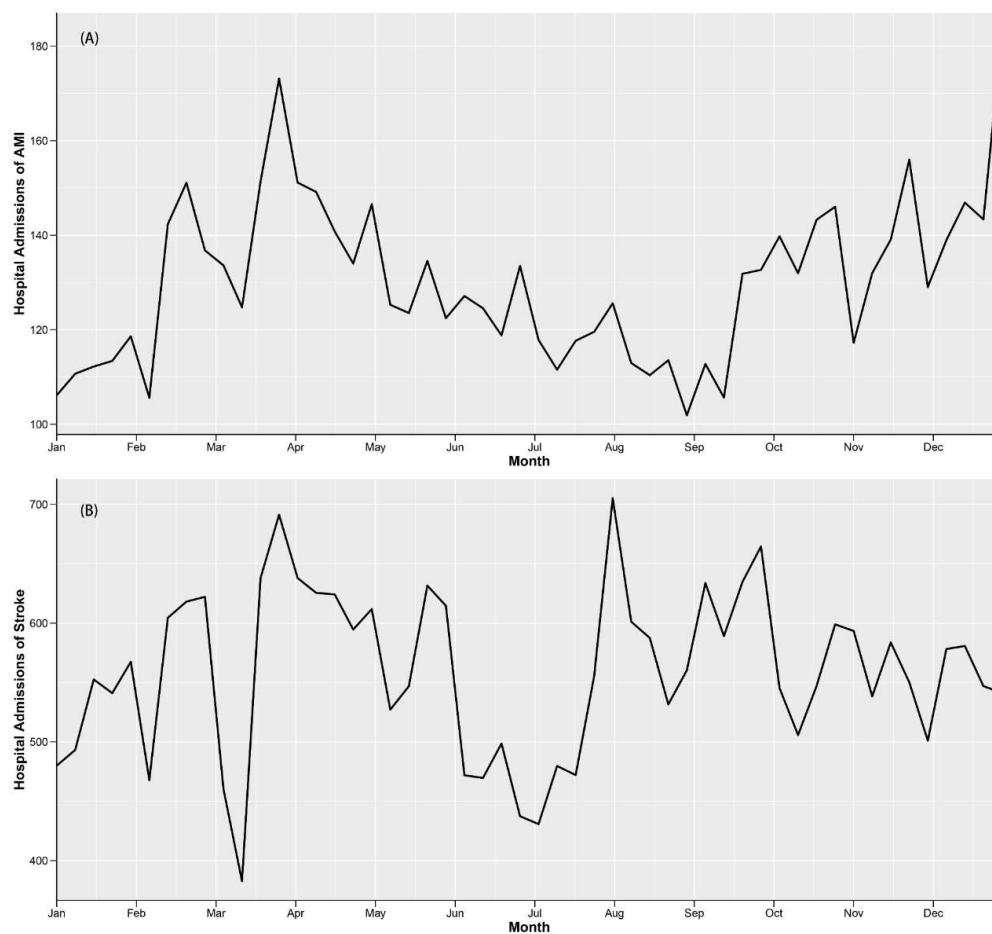

Supplementary figure 2 The overall monthly number of hospital admissions for AMI and stroke  
AMI, acute myocardial infarction. Panel A: for AMI; Panel B: for stroke. The number of admissions was averaged across years.

Supplementary table 1 Annual hospital admission rates (1/100,000) of AMI and stroke in age and sex subgroups

| Subgroups    | Year               | AMI                           |                            |                                   | Stroke                        |                            |                                   |
|--------------|--------------------|-------------------------------|----------------------------|-----------------------------------|-------------------------------|----------------------------|-----------------------------------|
|              |                    | Number of hospital admissions | Crude annual rate (95% CI) | Standardized annual rate (95% CI) | Number of hospital admissions | Crude annual rate (95% CI) | Standardized annual rate (95% CI) |
| Male         | 2013               | 4,374                         | 50.6 (49.2, 52.2)          | 47.1 (45.7, 48.5)                 | 15,529                        | 179.8 (177.0, 182.7)       | 165.0 (162.4, 167.7)              |
|              | 2014               | 4,598                         | 49.6 (48.2, 51.1)          | 46.3 (44.9, 47.7)                 | 17,322                        | 186.8 (184.1, 189.6)       | 172.3 (169.7, 174.9)              |
|              | 2015               | 5,363                         | 54.3 (52.8, 55.8)          | 50.2 (48.8, 51.6)                 | 21,351                        | 216.1 (213.3, 219.1)       | 197.8 (195.1, 200.5)              |
|              | 2016               | 5,922                         | 56.2 (54.8, 57.6)          | 51.9 (50.5, 53.2)                 | 21,859                        | 207.4 (204.7, 210.2)       | 189.6 (187.0, 192.2)              |
|              | 2017<br>(6 months) | 2,932                         | 53.2 (51.8, 54.6)          | 47.7 (46.4, 48.9)                 | 10,989                        | 199.3 (196.7, 201.9)       | 177.7 (175.3, 180.1)              |
|              | Total              | 23,189                        | 52.9 (52.3, 53.6)          | 48.7 (48.1, 49.3)                 | 87,050                        | 198.6 (197.4, 199.9)       | 180.9 (179.8, 182.1)              |
| Female       | 2013               | 1,448                         | 20.5 (19.4, 21.6)          | 21.1 (20.0, 22.2)                 | 7,533                         | 106.5 (104.1, 109.0)       | 110.7 (108.2, 113.3)              |
|              | 2014               | 1,519                         | 20.2 (19.2, 21.2)          | 20.5 (19.5, 21.6)                 | 7,826                         | 103.9 (101.6, 106.2)       | 107.3 (104.9, 109.7)              |
|              | 2015               | 1,700                         | 21.2 (20.2, 22.2)          | 21.2 (20.2, 22.3)                 | 9,760                         | 121.6 (119.2, 124.0)       | 124.7 (122.1, 127.2)              |
|              | 2016               | 1,829                         | 21.4 (20.5, 22.4)          | 21.3 (20.3, 22.3)                 | 10,390                        | 121.8 (119.5, 124.2)       | 123.8 (121.3, 126.2)              |
|              | 2017<br>(6 months) | 933                           | 21.0 (20.0, 21.9)          | 20.4 (19.4, 21.4)                 | 5,050                         | 113.5 (111.3, 115.7)       | 111.5 (109.3, 113.8)              |
|              | Total              | 7,429                         | 20.9 (20.4, 21.3)          | 20.9 (20.4, 21.3)                 | 40,559                        | 113.8 (112.8, 114.9)       | 115.8 (114.7, 116.9)              |
| Age <65 yrs  | 2013               | 2,862                         | 20.0 (19.3, 20.7)          | 18.7 (18.0, 19.4)                 | 9,958                         | 69.6 (68.2, 70.9)          | 66.9 (65.6, 68.3)                 |
|              | 2014               | 3,046                         | 19.9 (19.2, 20.6)          | 18.7 (18.0, 19.4)                 | 11,011                        | 71.9 (70.6, 73.3)          | 69.0 (67.7, 70.3)                 |
|              | 2015               | 3,589                         | 22.0 (21.3, 22.8)          | 20.5 (19.8, 21.2)                 | 13,837                        | 84.9 (83.5, 86.3)          | 81.5 (80.1, 82.9)                 |
|              | 2016               | 3,946                         | 22.8 (22.1, 23.5)          | 21.2 (20.5, 21.8)                 | 13,977                        | 80.6 (79.3, 82.0)          | 78.3 (77.0, 79.7)                 |
|              | 2017<br>(6 months) | 1,957                         | 21.7 (21.0, 22.4)          | 19.7 (19.1, 20.4)                 | 6,866                         | 76.1 (74.8, 77.4)          | 72.0 (70.8, 73.2)                 |
|              | Total              | 15,400                        | 21.3 (21.0, 21.7)          | 19.8 (19.5, 20.1)                 | 55,649                        | 76.9 (76.3, 77.5)          | 73.7 (73.1, 74.3)                 |
| Age ≥ 65 yrs | 2013               | 2,960                         | 212.2 (204.7, 220.0)       | 199.8 (192.4, 207.4)              | 13,104                        | 939.6 (923.6, 955.8)       | 891.4 (875.6, 907.4)              |
|              | 2014               | 3,071                         | 205.6 (198.4, 213.0)       | 192.6 (185.6, 199.8)              | 14,137                        | 946.4 (930.8, 962.1)       | 893.6 (878.3, 909.1)              |
|              | 2015               | 3,474                         | 216.4 (209.3, 223.7)       | 200.5 (193.6, 207.6)              | 17,274                        | 1,076.1 (1,060.1, 1,092.3) | 1,010.6 (995.0, 1,026.5)          |
|              | 2016               | 3,805                         | 219.7 (212.8, 226.8)       | 203.7 (197.0, 210.6)              | 18,272                        | 1,055.2 (1,039.9, 1,070.6) | 989.8 (974.9, 1,004.9)            |
|              | 2017<br>(6 months) | 1,908                         | 203.1 (196.7, 209.7)       | 188.8 (182.6, 195.1)              | 9,173                         | 976.5 (962.4, 990.7)       | 917.7 (904.0, 931.6)              |
|              | Total              | 15,218                        | 211.3 (208.2, 214.5)       | 196.9 (193.9, 200.0)              | 71,960                        | 1,001.1 (994.3, 1,008.1)   | 942.6 (935.9, 949.4)              |

AMI, acute myocardial infarction. 95% CI, 95% confidence interval. The standardized annual rates were age- and sex- adjusted according to the population in the sixth demographic census in Beijing.

Supplementary table 2 Average percentage change (%) in hospital admission rates for AMI and stroke after the Beijing tobacco control policy package (on a semesterly basis)

|           | AMI                       |                                               | Stroke                    |                                               |
|-----------|---------------------------|-----------------------------------------------|---------------------------|-----------------------------------------------|
|           | Immediate change (95% CI) | Semester change in the secular trend (95% CI) | Immediate change (95% CI) | Semester change in the secular trend (95% CI) |
| Overall   | -5.4 (-10.0, -0.5)        | 1.4 (-0.4, 3.2)                               | -5.6 (-7.8, -3.3)         | -8.0 (-8.7, -7.2)                             |
| Subgroups |                           |                                               |                           |                                               |
| <65 years | -6.0 (-12.4, 0.9)         | 1.2 (-1.2, 3.8)                               | -6.6 (-9.8, -3.2)         | -9.4 (-10.5, -8.2)                            |
| ≥65 years | -3.9 (-10.5, 3.2)         | 1.5 (-1.0, 4.0)                               | -3.9 (-6.8, -0.9)         | -7.8 (-8.8, -6.7)                             |
| Male      | -4.8 (-10.2, 0.8)         | 1.4 (-0.6, 3.5)                               | -6.4 (-9.0, -3.7)         | -8.7 (-9.6, -7.7)                             |
| Female    | -3.7 (-12.8, 6.3)         | 1.8 (-1.8, 5.5)                               | -3.2 (-7.2, 0.9)          | -6.2 (-7.6, -4.8)                             |

AMI, acute myocardial infarction.

Supplementary table 3 Average percentage change (%) after the false dates for AMI and stroke hospital admissions

| False dates | AMI                       |                                             | Stroke                    |                                             |
|-------------|---------------------------|---------------------------------------------|---------------------------|---------------------------------------------|
|             | Immediate change (95% CI) | Annual change in the secular trend (95% CI) | Immediate change (95% CI) | Annual change in the secular trend (95% CI) |
| 2014/6/24   | -5.4 (-31.0, 29.7)        | 2.6 (-15.1, 24.1)                           | 7.3 (-25.6, 54.8)         | -5.9 (-24.5, 17.3)                          |
| 2014/7/15   | -0.1 (-25.8, 34.4)        | 5.0 (-12.4, 25.9)                           | 16.7 (-17.2, 64.6)        | -3.5 (-21.7, 19.0)                          |
| 2014/9/23   | 7.4 (-16.4, 38.0)         | 7.5 (-8.2, 26.0)                            | 2.5 (-22.5, 35.5)         | -10.2 (-24.9, 7.5)                          |
| 2014/10/7   | 5.8 (-16.9, 34.6)         | 7.0 (-8.3, 24.9)                            | 0.8 (-22.9, 31.6)         | -10.9 (-25.2, 6.0)                          |
| 2014/10/28  | 13.6 (-9.7, 42.8)         | 8.9 (-6.1, 26.4)                            | 1.5 (-21.2, 30.7)         | -11.2 (-25.0, 5.0)                          |

AMI, acute myocardial infarction. 95% CI, 95% confidence interval.

Supplementary table 4 Average percentage change (%) in hospital admission rates for AMI and stroke using spline model of secular trend of time (95% CI)

|           | AMI                       |                                             | Stroke                    |                                             |
|-----------|---------------------------|---------------------------------------------|---------------------------|---------------------------------------------|
|           | Immediate change (95% CI) | Annual change in the secular trend (95% CI) | Immediate change (95% CI) | Annual change in the secular trend (95% CI) |
| Overall   | -6.8 (-11.4, -1.9)        | -24.1 (-36.1, -9.9)                         | -5.8 (-8.0, -3.5)         | -19.3 (-24.8, -13.5)                        |
| Subgroups |                           |                                             |                           |                                             |
| <65 years | -8.3 (-14.6, -1.5)        | -36.9 (-50.6, -19.5)                        | -6.6 (-9.8, -3.2)         | -17.9 (-20.4, -15.4)                        |
| ≥65 years | -3.9 (-10.5, 3.2)         | 3.0 (-2.0, 8.3)                             | -3.9 (-6.8, -0.9)         | -14.9 (-16.8, -13.0)                        |
| Male      | -6.4 (-11.6, -0.8)        | -26.3 (-39.4, -10.2)                        | -6.6 (-9.2, -3.9)         | -19.5 (-25.2, -13.3)                        |
| Female    | -4.5 (-13.6, 5.6)         | -10.7 (-31.9, 17.1)                         | -3.7 (-7.7, 0.5)          | -20.0 (-29.6, -9.0)                         |

AMI, acute myocardial infarction. 95% CI, 95% confidence interval.

Supplementary table 5 Average percentage change (%) in hospital admission rates for AMI including readmission within 28 days

|           | Linear time model         |                                             | Spline time model         |                                             |
|-----------|---------------------------|---------------------------------------------|---------------------------|---------------------------------------------|
|           | Immediate change (95% CI) | Annual change in the secular trend (95% CI) | Immediate change (95% CI) | Annual change in the secular trend (95% CI) |
| Overall   | -5.1 (-9.7, -0.3)         | 2.6 (-0.9, 6.2)                             | -6.6 (-11.1, -1.8)        | -26.0 (-37.6, -12.2)                        |
| Subgroups |                           |                                             |                           |                                             |
| <65 years | -5.8 (-12.1, 1.0)         | 2.3 (-2.5, 7.4)                             | -8.3 (-14.5, -1.6)        | -39.1 (-52.2, -22.4)                        |
| ≥65 years | -3.3 (-9.8, 3.7)          | 2.6 (-2.3, 7.7)                             | -3.3 (-9.8, 3.7)          | 2.6 (-2.3, 7.7)                             |
| Male      | -4.9 (-10.2, 0.6)         | 2.4 (-1.6, 6.6)                             | -6.6 (-11.8, -1.1)        | -28.5 (-41.2, -13.1)                        |
| Female    | -2.1 (-11.2, 8.0)         | 4.0 (-3.1, 11.5)                            | -2.8 (-12.0, 7.2)         | -11.9 (-33.2, 16.1)                         |

AMI, acute myocardial infarction. 95% CI, 95% confidence interval.
